# Supplementary material
Source: PubMed Central journal article supplement (PMC9856860)
Supplement: jamapediatr-e224885-s002.pdf [file jamapediatr-e224885-s002.pdf]

## **Data Sharing Statement**

Cushing. Mental Health Revisits at US Pediatric Emergency Departments. *JAMA Pediatr.*  
Published December 27, 2022. doi:10.1001/jamapediatrics.2022.4885

### **Data**

**Data available:** No
